# Supplementary material for: A Double-Blind, Randomized, Placebo-Controlled, Phase II Clinical Study To Evaluate the Efficacy and Safety of Camostat Mesylate (DWJ1248) in Adult Patients with Mild to Moderate COVID-19
Source: PubMed Central journal article supplement (PMC9872678; doi:10.1128/aac.00452-22), 2022-12-14
Supplement: aac.00452-22-s0001.pdf [file aac.00452-22-s0001.pdf]

**Supplementary Table 1. Demographic and Baseline (Randomized Set) [Subgroup: ≥60 years or Risk Factor - Yes]**

|                                            | <b>DWJ1248<br/>(N=116)</b> | <b>Placebo<br/>(N=112)</b> | <b>Total<br/>(N=228)</b> |
|--------------------------------------------|----------------------------|----------------------------|--------------------------|
| <b>Smoker, n(%)</b>                        | 116                        | 112                        | 228                      |
| Non-Smoker                                 | 67 (57.76)                 | 68 (60.71)                 | 135 (59.21)              |
| Smoker                                     | 25 (21.55)                 | 25 (22.32)                 | 50 (21.93)               |
| Ex-Smoker                                  | 24 (20.69)                 | 18 (16.07)                 | 42 (18.42)               |
| Unknown                                    | 0 (0.00)                   | 1 (0.89)                   | 1 (0.44)                 |
| p-value [£]                                |                            |                            | 0.6821 (f)               |
| <b>Risk factor, n(%)</b>                   | 116                        | 112                        | 228                      |
| Yes                                        | 96 (82.76)                 | 90 (80.36)                 | 186 (81.58)              |
| No                                         | 20 (17.24)                 | 22 (19.64)                 | 42 (18.42)               |
| p-value [£]                                |                            |                            | 0.6400 (c)               |
| <b>Cardiovascular disease1), n(%)</b>      | 96                         | 90                         | 186                      |
| Yes                                        | 13 (13.54)                 | 11 (12.22)                 | 24 (12.90)               |
| No                                         | 83 (86.46)                 | 79 (87.78)                 | 162 (87.10)              |
| <b>Chronic respiratory disease1), n(%)</b> | 96                         | 90                         | 186                      |
| Yes                                        | 1 (1.04)                   | 2 (2.22)                   | 3 (1.61)                 |
| No                                         | 95 (98.96)                 | 88 (97.78)                 | 183 (98.39)              |
| <b>High blood pressure1), n(%)</b>         | 96                         | 90                         | 186                      |
| Yes                                        | 50 (52.08)                 | 54 (60.00)                 | 104 (55.91)              |
| No                                         | 46 (47.92)                 | 36 (40.00)                 | 82 (44.09)               |
| <b>Diabetes1), n(%)</b>                    | 96                         | 90                         | 186                      |
| Yes                                        | 28 (29.17)                 | 19 (21.11)                 | 47 (25.27)               |
| No                                         | 68 (70.83)                 | 71 (78.89)                 | 139 (74.73)              |
| <b>Obesity1), n(%)</b>                     | 96                         | 90                         | 186                      |
| Yes                                        | 14 (14.58)                 | 13 (14.44)                 | 27 (14.52)               |
| No                                         | 82 (85.42)                 | 77 (85.56)                 | 159 (85.48)              |
| <b>Smoking1), n(%)</b>                     | 96                         | 90                         | 186                      |
| Yes                                        | 25 (26.04)                 | 25 (27.78)                 | 50 (26.88)               |
| No                                         | 71 (73.96)                 | 65 (72.22)                 | 136 (73.12)              |
| <b>COVID-19 Severity at Baseline, n(%)</b> | 116                        | 112                        | 228                      |
| Mild                                       | 89 (76.72)                 | 71 (63.39)                 | 160 (70.18)              |
| Moderate                                   | 27 (23.28)                 | 41 (36.61)                 | 68 (29.82)               |
| Severe                                     | 0 (0.00)                   | 0 (0.00)                   | 0 (0.00)                 |
| p-value [£]                                |                            |                            | 0.0278 (c)               |
| <b>COVID-19 Antibody, n(%)</b>             | 24                         | 27                         | 51                       |
| No                                         | 24 (100.00)                | 25 (92.59)                 | 49 (96.08)               |
| Yes                                        | 0 (0.00)                   | 2 (7.41)                   | 2 (3.92)                 |
| p-value [£]                                |                            |                            | 0.4918 (f)               |
| <b>Age group / Risk Factor, n(%)</b>       | 116                        | 112                        | 228                      |
| < 60years and Risk Factor - No             | 0 (0.00)                   | 0 (0.00)                   | 0 (0.00)                 |
| ≥ 60years or Risk Factor - Yes             | 116 (100.00)               | 112 (100.00)               | 228 (100.00)             |

|                                                         |             |             |             |
|---------------------------------------------------------|-------------|-------------|-------------|
| p-value [£]                                             |             |             | NC          |
| <b>Subjective Symptoms by Subject at Baseline, n(%)</b> | 114         | 109         | 223         |
| At least one Moderate or Severe                         | 38 (33.33)  | 42 (38.53)  | 80 (35.87)  |
| Other                                                   | 76 (66.67)  | 67 (61.47)  | 143 (64.13) |
| p-value [£]                                             |             |             | 0.4185 (c)  |
| <b>RT-PCR at Baseline, n(%)</b>                         | 116         | 112         | 228         |
| Inconclusive                                            | 1 (0.86)    | 0 (0.00)    | 1 (0.44)    |
| Negative                                                | 3 (2.59)    | 2 (1.79)    | 5 (2.19)    |
| Positive                                                | 112 (96.55) | 110 (98.21) | 222 (97.37) |
| p-value [£]                                             |             |             | 1.0000 (f)  |
| <b>Ordinal scale at Baseline, n(%)</b>                  | 116         | 112         | 228         |
| 0                                                       | 2 (1.72)    | 2 (1.79)    | 4 (1.75)    |
| 1                                                       | 0 (0.00)    | 0 (0.00)    | 0 (0.00)    |
| 2                                                       | 46 (39.66)  | 45 (40.18)  | 91 (39.91)  |
| 3                                                       | 68 (58.62)  | 65 (58.04)  | 133 (58.33) |
| p-value [£]                                             |             |             | 1.0000 (f)  |
| <b>NEWS score at Baseline, n(%)</b>                     | 116         | 112         | 228         |
| 0                                                       | 50 (43.10)  | 47 (41.96)  | 97 (42.54)  |
| 1                                                       | 39 (33.62)  | 39 (34.82)  | 78 (34.21)  |
| 2                                                       | 19 (16.38)  | 15 (13.39)  | 34 (14.91)  |
| 3                                                       | 6 (5.17)    | 8 (7.14)    | 14 (6.14)   |
| 4                                                       | 1 (0.86)    | 3 (2.68)    | 4 (1.75)    |
| 5                                                       | 1 (0.86)    | 0 (0.00)    | 1 (0.44)    |
| p-value [£]                                             |             |             | 0.8067 (f)  |
| <b>NEWS Severity at Baseline, n(%)</b>                  | 116         | 112         | 228         |
| Mild                                                    | 115 (99.14) | 110 (98.21) | 225 (98.68) |
| Moderate                                                | 1 (0.86)    | 2 (1.79)    | 3 (1.32)    |
| Severe                                                  | 0 (0.00)    | 0 (0.00)    | 0 (0.00)    |
| p-value [£]                                             |             |             | 0.6168 (f)  |

SD = standard deviation, Min = minimum, Max = maximum, NC = not calculated.

Note: Denominator of percentage is the number of subjects in each group.

[†] Testing for difference between treatment groups (two sample t-test (t) or Wilcoxon rank-sum test (w)).

[£] Testing for difference among treatment groups (chi-square test (c) or Fisher's exact test (f)).

**Supplementary Table 2. Concomitant Medication (Randomized Set)**

|                                             | <b>DWJ1248<br/>(N=172)</b> | <b>Placebo<br/>(N=170)</b> | <b>Total<br/>(N=342)</b> |
|---------------------------------------------|----------------------------|----------------------------|--------------------------|
| <b>Subjects with Concomitant Medication</b> | 149(86.63) [1706]          | 157(92.35) [1701]          | 306(89.47) [3407]        |
| 95% Confidence Interval                     | [81.54, 91.71]             | [88.36, 96.35]             | [86.22, 92.73]           |
| p-value [£]                                 |                            |                            | 0.0845 (c)               |
| <b>Subjects with Analgesic</b>              | 113(65.70) [241]           | 115(67.65) [250]           | 228(66.67) [491]         |
| 95% Confidence Interval                     | [58.60, 72.79]             | [60.61, 74.68]             | [61.67, 71.66]           |
| p-value [£]                                 |                            |                            | 0.7022 (c)               |
| <b>Subjects with Anti</b>                   | 55(31.98) [80]             | 47(27.65) [69]             | 102(29.82) [149]         |
| 95% Confidence Interval                     | [25.01, 38.95]             | [20.92, 34.37]             | [24.98, 34.67]           |
| p-value [£]                                 |                            |                            | 0.3815 (c)               |
| <b>Subjects with AntiHistamine</b>          | 46(26.74) [53]             | 45(26.47) [74]             | 91(26.61) [127]          |
| 95% Confidence Interval                     | [20.13, 33.36]             | [19.84, 33.10]             | [21.92, 31.29]           |
| p-value [£]                                 |                            |                            | 0.9543 (c)               |
| <b>Subjects with NSAIDs</b>                 | 44(25.58) [80]             | 48(28.24) [74]             | 92(26.90) [154]          |
| 95% Confidence Interval                     | [19.06, 32.10]             | [21.47, 35.00]             | [22.20, 31.60]           |
| p-value [£]                                 |                            |                            | 0.5800 (c)               |
| <b>Subjects with Cough</b>                  | 104(60.47) [340]           | 117(68.82) [373]           | 221(64.62) [713]         |
| 95% Confidence Interval                     | [53.16, 67.77]             | [61.86, 75.79]             | [59.55, 69.69]           |
| p-value [£]                                 |                            |                            | 0.1060 (c)               |
| <b>Subjects with Sore.T</b>                 | 25(14.53) [33]             | 32(18.82) [42]             | 57(16.67) [75]           |
| 95% Confidence Interval                     | [9.27, 19.80]              | [12.95, 24.70]             | [12.72, 20.62]           |
| p-value [£]                                 |                            |                            | 0.2873 (c)               |
| <b>Subjects with Ms.Relax</b>               | 7(4.07) [14]               | 5(2.94) [5]                | 12(3.51) [19]            |
| 95% Confidence Interval                     | [1.12, 7.02]               | [0.40, 5.48]               | [1.56, 5.46]             |
| p-value [£]                                 |                            |                            | 0.5706 (c)               |
| <b>Subjects with Patch</b>                  | 9(5.23) [12]               | 9(5.29) [12]               | 18(5.26) [24]            |
| 95% Confidence Interval                     | [1.90, 8.56]               | [1.93, 8.66]               | [2.90, 7.63]             |
| p-value [£]                                 |                            |                            | 0.9797 (c)               |
| <b>Subjects with Migraine</b>               | 4(2.33) [5]                | 0                          | 4(1.17) [5]              |
| Exact 95% Confidence Interval               | [0.64, 5.85]               | [0.00, 2.15]               | [0.32, 2.97]             |
| p-value [£]                                 |                            |                            | 0.1228 (f)               |

Note: Denominator of percentage is the number of subjects in each group.

Results are displayed as 'number of subjects(percentage of subjects) [number of event]'.

[£] Testing for difference among treatment groups (chi-square test (c) or Fisher's exact test (f)).

## Supplementary Figure 1. Clinical improvement defined

< Classification of general severity >

| Score | State    | Classification of general severity                                                                 |
|-------|----------|----------------------------------------------------------------------------------------------------|
| 0     | None     | No symptoms                                                                                        |
| 1     | Mild     | If it is easily tolerated by causing minimal discomfort without interfering with normal daily life |
| 2     | Moderate | If it causes discomfort that interferes with normal daily life to some extent                      |
| 3     | Severe   | When it makes normal daily activities impossible                                                   |

Example:

| COVID-19 Symptoms |                     | Baseline | Treatment period (day) |   |   |   |   |   |   |   |    |    |    |    |    |    |
|-------------------|---------------------|----------|------------------------|---|---|---|---|---|---|---|----|----|----|----|----|----|
|                   |                     | Day 1    | 2                      | 3 | 4 | 5 | 6 | 7 | 8 | 9 | 10 | 11 | 12 | 13 | 14 | 15 |
| a                 | Feeling hot         | 2        | 2                      | 2 | 1 | 2 | 3 | 1 | 2 | 2 | 1  | 2  | 1  | 3  | 1  | 1  |
| b                 | Cough               | 2        | 2                      | 2 | 2 | 2 | 1 | 0 | 2 | 2 | 0  | 2  | 0  | 2  | 0  | 0  |
| c                 | Sorthness of breath | 1        | 0                      | 0 | 0 | 0 | 0 | 0 | 0 | 0 | 0  | 1  | 0  | 1  | 0  | 0  |
| d                 | Chills              | 0        | 0                      | 0 | 0 | 0 | 0 | 0 | 0 | 0 | 0  | 0  | 0  | 0  | 0  | 0  |
| e                 | Muscle ache         | 1        | 0                      | 1 | 0 | 0 | 0 | 0 | 1 | 1 | 0  | 1  | 0  | 1  | 0  | 0  |
| f                 | Headache            | 0        | 0                      | 0 | 0 | 0 | 0 | 0 | 0 | 0 | 0  | 0  | 0  | 0  | 0  | 0  |
| g                 | Sore throat         | 0        | 0                      | 0 | 0 | 2 | 0 | 1 | 2 | 0 | 0  | 0  | 1  | 0  | 0  | 1  |

Subjects were identified as having COVID-19 disease and enrolled within 7 days of symptom onset according to our protocol inclusion criteria.

The subject had symptoms ‘a’, ‘b’, ‘c’ and ‘e’ on Day 1 (=baseline), thus was administrated an Investigational Product.

- On Day 4, symptoms ‘a’, ‘c’ and ‘e’ were improved, but symptom ‘b’ was maintained at 2 points, so there was no “clinical improvement”.
- On Days 7 symptoms ‘a’, ‘b’, ‘c’ and ‘e’ were improved, but symptom ‘g’ was worsened to 1 point, so there was no “clinical improvement”.
- On Day 10 and 14, symptoms ‘a’, ‘b’, ‘c’ and ‘e’ were improved, and all other symptoms maintained at 0 points, so there was “clinical improvement”.

Time to clinical improvement of subjective symptoms, defined as the first day of symptom improvement.
